# Supplementary material
Source: publisher site journal article supplement (http://www.spandidos-publications.com/4076/downloadSupplementary)

Figure S1. Nucleotide excision repair pathway enzyme protein expression in cisplatin-resistant cell lines was assessed using western blotting. Each band intensity was calculated using Image Lab. 5.2 software (Bio Rad Laboratories, Inc.). ERCC1, ERCC1, excision repair cross-complementation group 1; XP, xeroderma pigmentosum group-complementing protein.

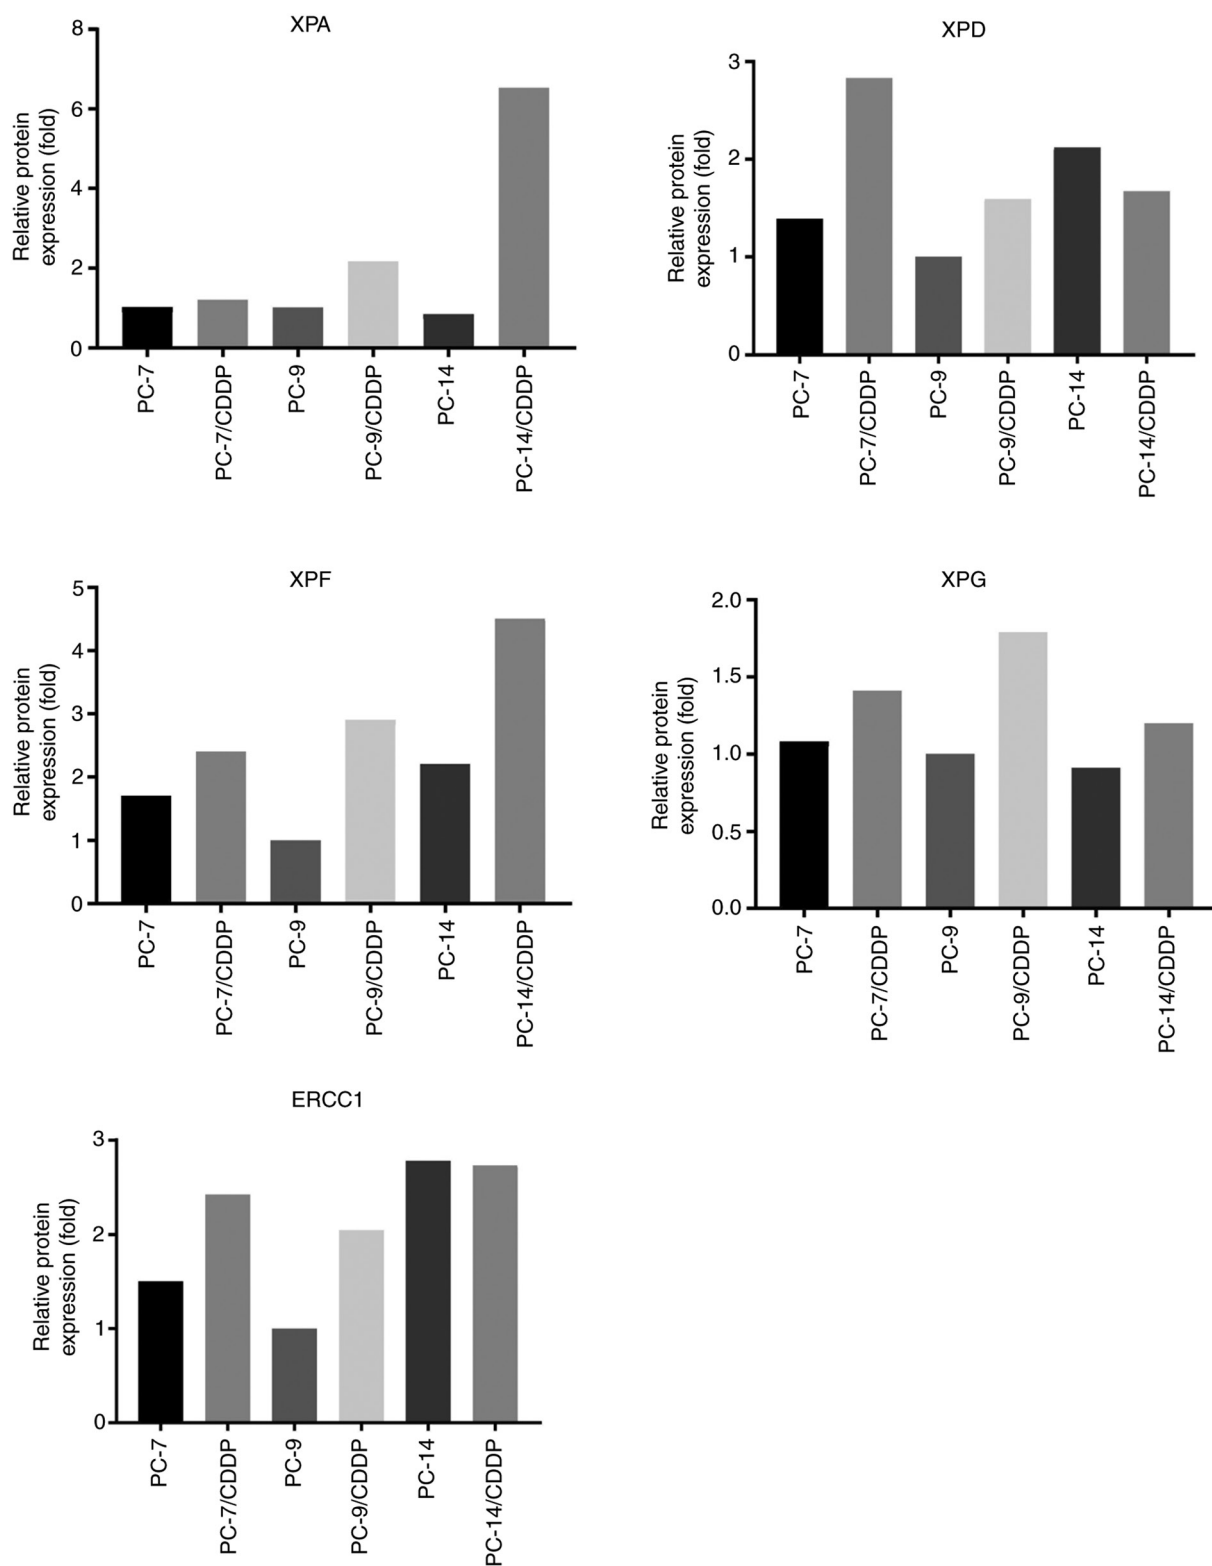

Figure S2. Silencing of siRNA for nucleotide excision repair proteins. Protein expression levels were assessed by western blotting 120 h after siRNA transfection. Each band intensity was calculated using Image Lab. 5.2 software (Bio Rad Laboratories, Inc.). ERCC1, excision repair cross-complementation group 1; XP, xeroderma pigmentosum group-complementing protein.

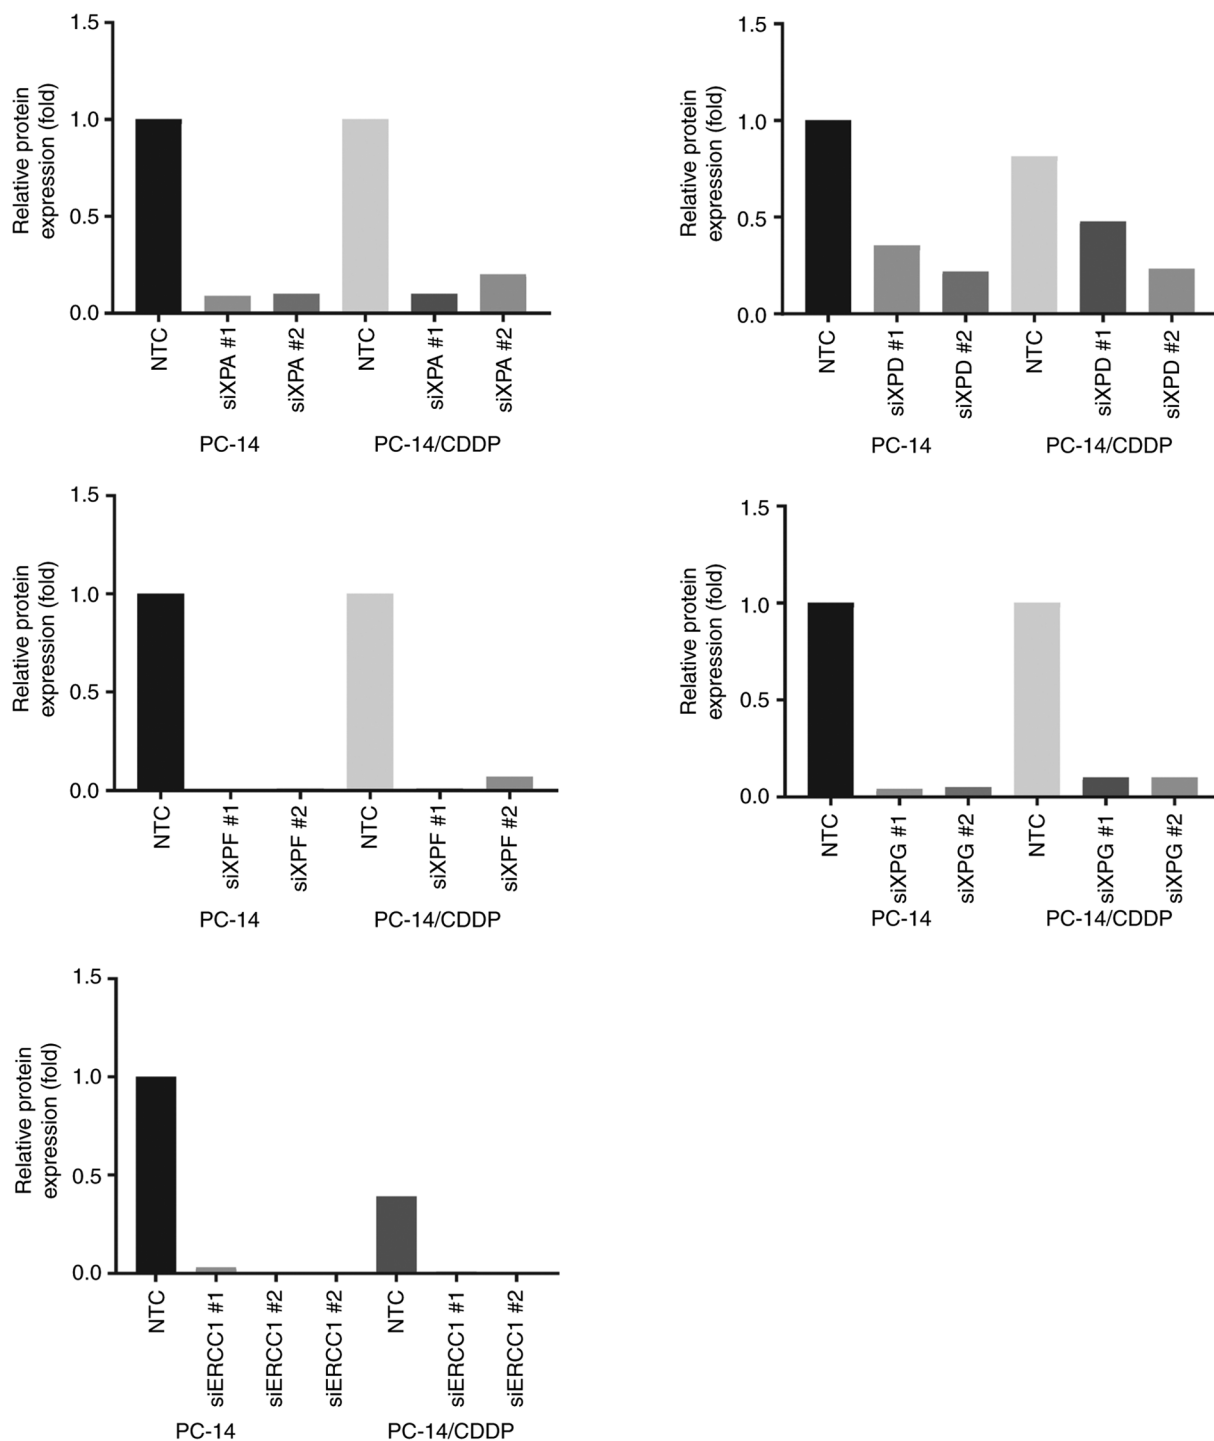

Supplement: Supplementary file 1 [file downloadSupplementary]
